# Supplementary material
Source: HighWire-hosted journal article supplement (https://erj.ersjournals.com/content/56/6/2002889)
Supplement: inline-supplementary-material-1 [file inline-supplementary-material-1.pdf]

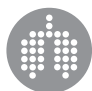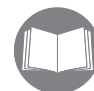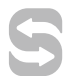

SHAREABLE PDF

# Consensus-based recommendations in respiratory medicine

Kevin C. Wilson

**Affiliation:** Dept of Medicine, Boston University School of Medicine, Boston, MA, USA.

**Correspondence:** Kevin C. Wilson, ATS Documents, 10 Whitney Ave, Westwood, MA 02090, USA.  
E-mail: kwilson@thoracic.org

 @ERSpublications

**When conducted by experts in a field, a Delphi-like process called the CORE process can yield recommendations that are highly concordant with guideline recommendations that have been informed by a systematic review of the literature** <https://bit.ly/3klCSua>

**Cite this article as:** Wilson KC. Consensus-based recommendations in respiratory medicine. *Eur Respir J* 2020; 56: 2002889 [<https://doi.org/10.1183/13993003.02889-2020>].

This single-page version can be shared freely online.

5 years ago, I watched one of the world's most prominent guideline methodologists present a flawless systematic review to inform a guideline committee's recommendations. At the conclusion of the presentation, a member of the guideline committee turned to me, smiled, and whispered, "that was great work, but I could have told you the results 9 months ago." The comment stuck with me.
